# Supplementary material for: Constitutive Activation of STAT3 in Myeloma Cells Cultured in a Three-Dimensional, Reconstructed Bone Marrow Model
Source: Preprints.org preprint supplement (doi:10.20944/preprints201803.0151.v1), 2018-03-19
Supplement: Supplementary file 1 [file supplementary]

Archive with 7 entries (7 files):
- Figure S1.pptx
- Figure S2.pptx
- Figure S3.pptx
- Figure S4.pptx
- Figure S5.pptx
- Figure S6.pptx
- Supplementary Figure legends_Cancers.pdf
