# Supplementary material for: Constitutive Activation of STAT3 in Myeloma Cells Cultured in a Three-Dimensional, Reconstructed Bone Marrow Model
Source: Preprints.org preprint supplement (doi:10.20944/preprints201803.0151.v1), 2018-03-19
Supplement: Supplementary file 1 [file supplementary › Supplementary Figure legends_Cancers.pdf]

## **Supplemental Document**

**Figure S1. MM-3D cells form larger cell spheroids.** The number of cell clusters with the greatest dimension >50  $\mu\text{m}$  from three different microscopic images of U266 and U266-3D cells were counted. The images were of 100-fold magnification. The error bars represent the standard deviation from three different fields, \* $p < 0.05$ , Student's t-test.

**Figure S2. MM cells cultured conventionally do not acquire STAT3 activity.** The STAT3 activity of U266 and RPMI8226 cells in conventional (2D) culture from day 1 to day 4 were examined by Western blot analysis of pSTAT3 levels.  $\beta$ -actin was probed as a loading control. SupM2 cell lysate was also included as a positive control for pSTAT3 level.  $2.5 \times 10^5$  cells were seeded initially.

**Figure S3. Stattic does not induce apoptosis in conventionally cultured MM cells.** (A) The effect of STAT3 inhibition on apoptosis in U266 and RPMI8226 cells in conventional culture. The cells were treated with Stattic for 24 hours and stained with an apoptotic marker Annexin V. The percentage of Annexin V-positive cells was analyzed by flow cytometry. (B) The expression levels of two apoptotic markers, cleaved PARP and cleaved caspase 3, in U266 and RPMI8226 cells cultured conventionally after 24 hours of Stattic treatment were examined by Western blot analysis.  $\beta$ -actin was probed as a loading control. For all the experiments above, U266 and RPMI8226 cells were cultured for 2 and 1 days before the Stattic treatment to reach a substantial pSTAT3 level, respectively.  $2.5 \times 10^5$  cells were seeded initially.

**Figure S4. Stattic does not improved bortezomib-induced cytotoxicity in MM cells cultured conventionally.** Cell viability of U266 and RPMI8226 cells in conventional culture was measured after treatment with Stattic, bortezomib (BTB) or both for 48 hours. U266 and RPMI8226 were pre-cultured in 3D for 2 days and 1 day before drug treatment, respectively. Cell viability was measured by MTS assay and normalized to the cell viability of untreated cells.  $2.5 \times 10^5$  cells were seeded initially. The error bars represent standard deviation from a triplicate experiment, \*\* $p < 0.001$ , Student's t-test.

**Figure S5. Gene expression changes in MM-3D cells are STAT3-relevant.** (A) Oligonucleotide assay of human cancer-related genes using U266 or U266-3D cDNA. The cDNA was extracted from U266 cells after 2 days in conventional (2D) or 3D culture. All 2D and 3D gene expressions were normalized to the corresponding *GAPDH* expressions. The logarithm of gene expression ratio (3D/2D) was computed for each gene and ranked from the highest (left) to the lowest (right). The top three most upregulated (blue) and downregulated (red) genes were indicated in the graph. (B) Signaling pathway analysis of the top three most upregulated and downregulated genes from (A) and their relationship with STAT3 using Pathway Common Network Visualizer. A blue line connects

two genes which one can affect the expression level of another. A green line connects two genes which one can affect the protein state of another.

**Figure S6. Schematic procedure of immunocytochemistry of MM-3D cells.**
